# Supplementary material for: Performance of InterVA for assigning causes of death to verbal autopsies: multisite validation study using clinical diagnostic gold standards
Source: Popul Health Metr. 2011 Aug 5;9:50. doi: 10.1186/1478-7954-9-50 (PMC3160943; doi:10.1186/1478-7954-9-50)
Supplement: Additional file 3 — Mapping between InterVA input questions and PHMRC survey questions for neonates. [file 1478-7954-9-50-S3.XLSX]

## Sheet: Annex 3
Mapping between InterVA input questions and PHMRC survey questions for neonates
InterVA Question	PHMRC Question
was this an elder 65+ years	N/A*
was this an adult 50-64 years	N/A
was this a female 15-49 years	N/A
was this a male 15-49 years	N/A
was this a child 5-14 years	N/A
was this a child 1-4 years	N/A
was this an infant 4 weeks-1 years	N/A
was this a neonate < 4 weeks	What was the last known age of the deceased? [days]
was she pregnant at death	N/A
did pregnancy end within 6 weeks	N/A
did final illness last at least 3 weeks	How long did the illness last? [days]
did final illness last < 3 weeks	How long did the illness last? [days]
was death very sudden or unexpected	Did the infant appear to be healthy and then just die suddenly?
was death during wet season	Date of death [month]
was death during dry season	Date of death [month]
was s/he in a transport accident	No Question**
did s/he drown	No Question
had s/he fallen recently	No Question
any poisoning, bite, sting	No Question
was s/he a known smoker	N/A
any obvious recent injury	"injuries"
was s/he known to drink alcohol	N/A
any suggestion of homicide	N/A
any convulsions or fits	During the illness that led to death did the baby have spasms or convulsions?
any diagnosis of epilepsy	N/A
was the fontanelle raised	During the illness that led to death, did the baby have a bulging fontanelle?
was the fontanelle or eyeball sunken	No Question
any headache	N/A
was there paralysis on both sides	No Question
any paralysis/weakness on one side	No Question
any stiff neck	No Question
any oral candidiasis	No Question
any rigidity/lockjaw	No Question
abnormal hair colouring	No Question
any coughing with blood	N/A
any chest pain	N/A
was there a cough for > 3 weeks	N/A
was there a cough for up to 3 weeks	N/A
any productive cough	N/A
any rapid breathing	During the illness that led to death, did the baby have fast breathing?
any breathlessness on exertion	N/A
any breathlessness lying flat	N/A
any chest indrawing	During the illness that led to death, did the baby have indrawing of the chest?
any difficulty breathing	During the illness that led to death, did the baby have difficult breathing?
any breast lump or lesion	N/A
any wheezing	No Question
any cyanosis	During the illness that led to death, did he/she have areas of the skin that turned black?
any abdominal mass	No Question
any abdominal pain	N/A
any diarrhea with blood	No Question
any vomiting with blood	No Question
any acute diarrhea < 2 weeks	"diarrheal"; During the illness that led to death, did he/she have more frequent loose or liquid stools than usual?
any persistent diarrhea 2-4 weeks	N/A
any chronic/recurrent diarrhea 4+ weeks	No Question
any abdominal swelling	No Question
any vomiting	During the illness that led to death, did he/she vomit everything?; "vomiting"
any yellowness/jaundice	During the illness that led to death, did the baby have yellow eyes?; During the illness that led to death, did he/she have yellow skin?
any abnormality of urine	No Question
any urinary retention	No Question
any haematuria	No Question
any swelling of ankles/legs	No Question
no bilateral swelling of ankle	N/A
any skin lesions/ulcers	During the illness that led to death, did the baby have ulcer(s) (pits)?
any rash, non-measles	During the illness that led to death, did the baby have an area(s) of skin with redness and swelling?
any herpes zoster	No Question
any measles rash	No Question
any excessive night sweats	N/A
any excessive water intake	N/A
any excessive urination	N/A
any excessive food intake	N/A
any acute fever	During the illness that led to death, did the baby have fever?; How many days did the fever last? [days]
any persistent fever > 2 weeks	During the illness that led to death, did the baby have fever?; How many days did the fever last? [days]
any enlarged/swollen glands	N/A
any facial swelling	No Question
was there a coma > 24 hours	"unconscious"
any weight loss	No Question
any anaemia/paleness	"anemic"; "anemia"; "anemia"
any drowsiness	No Question
any delayed/regressed development	N/A
any diagnosis of asthma	N/A
any diagnosis of diabetes	N/A
any diagnosis of heart disease	N/A
any diagnosis of HIV/AIDS	N/A
any diagnosis of hypertension	N/A
been discharged from hospital very ill	No Question
any suggestion of suicide	N/A
any surgery just before death	No Question
any diagnosis of TB	N/A
was s/he adequately vaccinated	No Question
any diagnosis of liver disease	N/A
any diagnosis of cancer	N/A
any diagnosis of stroke	N/A
any diagnosis of measles	No Question
any diagnosis of kidney disease	N/A
any diagnosis of haemoglobinopathy	N/A
any diagnosis of malaria	N/A
any delivery complications	How much time before labor did the water break?; What was the color of the liquor when the water broke?; Was the liquor foul smelling?; Complications: Mother had anemia; Complications: Placenta came out first; Complications: Fever during labor; Complications: Excessive bleeding ; Complications: Cord delivered first; Complications: Cord around child's neck; Complications: Other specify; Complicati…
any heavy bleeding before/after delivery	Complications: Excessive bleeding; "hemorrhage"
was there prolonged labour > 24 hours	How much time did the labor and delivery take? [days]
were there convulsions during delivery	Complications: Mother had convulsions; "convulsion"
was the baby born early < 34 weeks	Did the pregnancy end early, on time, or late?; :premature"; "prematurity"; "preterm";
was the baby small < 2500 grams	What was the weight of the deceased at birth?; At the time of the delivery what was the size of the deceased?
was there difficulty breathing at birth	Did the baby have difficulty breathing?
any congenital malformations	Abormalities: Head size very large at time of birth?; Abormalities: Head size very small at time of birth?; Was any part of the baby physically abnormal at time of delivery?; Abnormalities: Mass defect on the back of head or spine; Was the baby's body (skin and tissue) pulpy?; Abnormalities: Other; "congenital"
was this a multiple birth	Was the deceased a singleton or multiple birth?
any umbilical infection	During the illness that led to death, did the baby have redness of the umbilical cord stump?; During the illness that led to death, did the baby have pus drainage from the umbilical cord stump?; Did the redness of the umbilical cord stump extend onto the abdominal skin?
* "N/A" indicates that the question would not be asked to this age-group.
** "No Question" indicates that there was no PHMRC question mapped to the item.
