# Supplementary material for: Performance of InterVA for assigning causes of death to verbal autopsies: multisite validation study using clinical diagnostic gold standards
Source: Popul Health Metr. 2011 Aug 5;9:50. doi: 10.1186/1478-7954-9-50 (PMC3160943; doi:10.1186/1478-7954-9-50)
Supplement: Additional file 8 — Chance-corrected concordance (%) for adult, child, and neonatal causes across 500 Dirichlet draws (excluding free text, one cause selection). [file 1478-7954-9-50-S8.XLSX]

## Sheet: Annex 8
Chance-corrected concordance (%) for adult, child, and neonatal causes across 500 Dirichlet draws (excluding free text, one cause selection)
Cause	Chance-Corrected Concordance (%)
Adult Causes
Acute cardiac death	13.0 (12.7, 13.2)
Chronic cardiac death	36.7 (36.4, 37.2)
Chronic respiratory disease	5.0 (4.8, 5.3)
Diabetes	21.2 (20.9, 21.5)
Diarrhea/Dysentery	4.8 (4.6, 4.9)
Disease of nervous system	-4.3 (-4.3, -4.3)
Drowning	1.4 (1.2, 1.6)
HIV/AIDS	39.0 (38.7, 39.4)
Homicide	52.7 (52.3, 53.2)
Kidney or urinary disease	3.2 (3.1, 3.5)
Liver disease	53.0 (52.6, 53.4)
Malaria	1.8 (1.6, 1.9)
Malignancy	49.3 (49.1, 49.8)
Maternal Death	47.8 (47.5, 48.0)
Other Noncommunicable Diseases	-4.0 (-4.0, -3.9)
Other acute infection	1.0 (0.9, 1.1)
Other digestive disease	3.7 (3.5, 3.8)
Other fatal accident	15.1 (14.7, 15.5)
Pneumonia/Sepsis	30.5 (30.2, 30.8)
Poisoning	11.3 (11.1, 11.6)
Stroke	32.3 (31.9, 32.8)
Suicide	27.5 (27.2, 28.0)
Transport-related accident	85.6 (85.4, 85.8)
Tuberculosis (pulmonary)	53.2 (52.8, 53.5)
Mean Across Adult Causes	24.2 (24.1, 24.3)
Child Causes
Chronic cardiac death	-5.9 (-5.9, -5.9)
Chronic respiratory disease	-5.9 (-5.9, -5.9)
Diarrhea/Dysentery	30.0 (29.4, 31.0)
Drowning	55.8 (54.9, 56.4)
HIV/AIDS	47.1 (46.5, 47.7)
Homicide	45.5 (45.1, 46.3)
Malaria	1.0 (0.7, 1.6)
Malignancy	-5.9 (-5.9, -5.9)
Measles	-5.9 (-5.9, -5.9)
Meningitis	46.5 (46.0, 47.1)
Other Defined Causes of Child Deaths	-1.4 (-1.6, -1.1)
Other Injuries	15.3 (14.9, 15.9)
Other acute infection	-5.9 (-5.9, -5.9)
Other digestive disease	-5.9 (-5.9, -5.9)
Pneumonia/Sepsis	47.1 (47.1, 47.8)
Poisoning	58.9 (58.4, 59.3)
Transport-related accident	95.7 (95.5, 96.0)
Tuberculosis (pulmonary)	41.3 (41.2, 42.2)
Mean Across Child Causes	24.9 (24.7, 25.0)
Neonatal Causes
Congenital malformation	-12.9 (-13.2, -12.7)
Meningitis	-25.0 (-25.0, -25.0)
Perinatal asphyxia	77.4 (77.0, 77.7)
Pneumonia/Sepsis	-2.8 (-3.1, -2.5)
Pre-term/small baby	-4.8 (-5.1, -4.5)
Mean Across Neonatal Causes	6.3 (6.1, 6.5)
