# Supplementary figures and images for: Performance of InterVA for assigning causes of death to verbal autopsies: multisite validation study using clinical diagnostic gold standards
Source: Springer Nature journal article supplement (doi:10.1186/1478-7954-9-50), 2011-08-05

Pneumonia/Sepsis

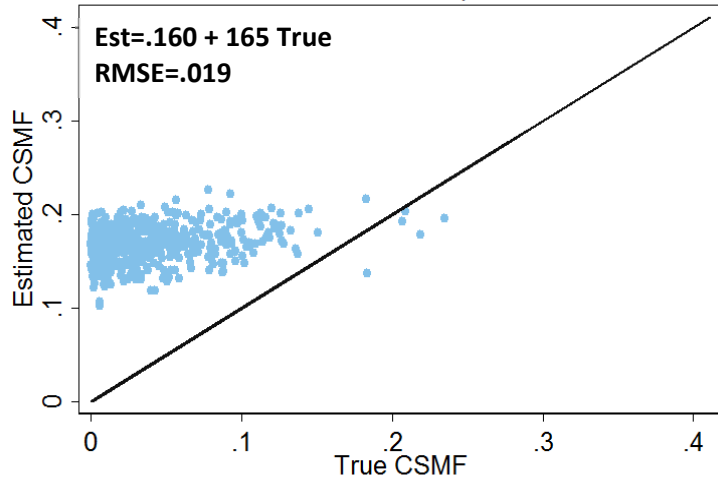

Homicide

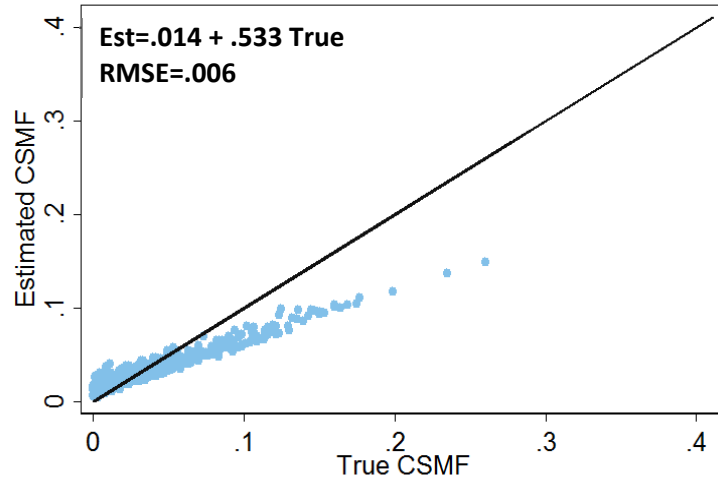

Maternal Death

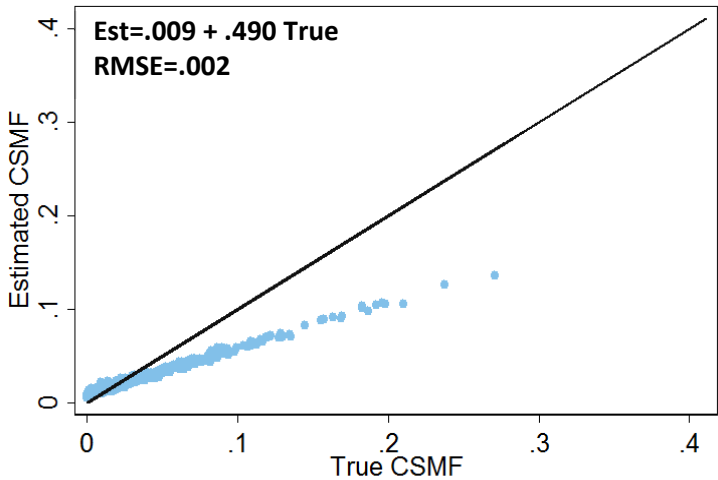

HIV/AIDS

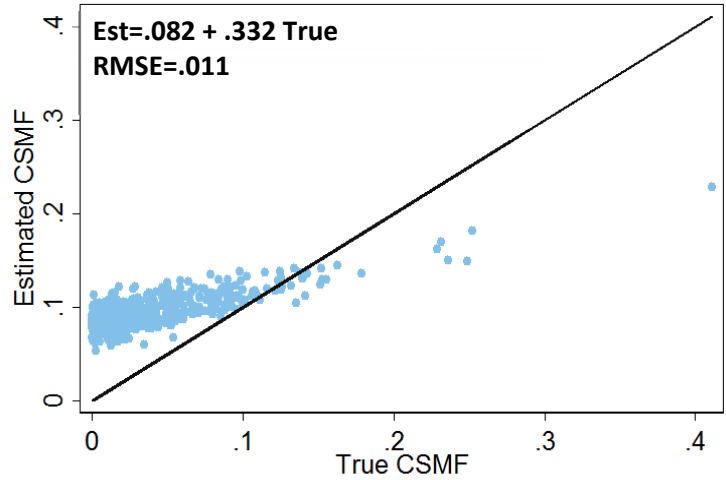

Supplement: 12963_2011_172_MOESM13_ESM.pdf [file 12963_2011_172_MOESM13_ESM.pdf]
